# Supplementary material
Source: ML conference proceedings conference paper supplement (https://proceedings.neurips.cc/paper_files/paper/2021/hash/a081c174f5913958ba8c6443bacffcb9-Abstract.html)
Supplement: Supplementary file 1 [file a081c174f5913958ba8c6443bacffcb9-Supplemental.zip]

Archive with 464 entries (320 files):
- separation_results_final_supp_mat/
- separation_results_final_supp_mat/.DS_Store
- __MACOSX/
- __MACOSX/separation_results_final_supp_mat/
- __MACOSX/separation_results_final_supp_mat/._.DS_Store
- separation_results_final_supp_mat/separation_results_full_paper_final.pdf
- __MACOSX/separation_results_final_supp_mat/._separation_results_full_paper_final.pdf
- separation_results_final_supp_mat/separation_results_code/
- separation_results_final_supp_mat/separation_results_code/f1_f2_sliced_w.slurm
- __MACOSX/separation_results_final_supp_mat/separation_results_code/
- __MACOSX/separation_results_final_supp_mat/separation_results_code/._f1_f2_sliced_w.slurm
- separation_results_final_supp_mat/separation_results_code/res/
- separation_results_final_supp_mat/separation_results_code/res/f1_f2_ipm/
- separation_results_final_supp_mat/separation_results_code/res/f1_f2_ipm/f1_f2_ipm_12_6_10000_10000_42_1_0.5_1.0_0.0.pkl
- __MACOSX/separation_results_final_supp_mat/separation_results_code/res/
- __MACOSX/separation_results_final_supp_mat/separation_results_code/res/f1_f2_ipm/
- __MACOSX/separation_results_final_supp_mat/separation_results_code/res/f1_f2_ipm/._f1_f2_ipm_12_6_10000_10000_42_1_0.5_1.0_0.0.pkl
- separation_results_final_supp_mat/separation_results_code/res/f1_f2_ipm/f1_f2_ipm_12_6_1000000_10000_42_1_0.5_1.0_0.0.pkl
- __MACOSX/separation_results_final_supp_mat/separation_results_code/res/f1_f2_ipm/._f1_f2_ipm_12_6_1000000_10000_42_1_0.5_1.0_0.0.pkl
- separation_results_final_supp_mat/separation_results_code/res/f1_f2_ipm/f1_f2_ipm_12_6_5000000_10000_42_1_0.5_1.0_0.0.pkl
- __MACOSX/separation_results_final_supp_mat/separation_results_code/res/f1_f2_ipm/._f1_f2_ipm_12_6_5000000_10000_42_1_0.5_1.0_0.0.pkl
- separation_results_final_supp_mat/separation_results_code/res/f1_f2_ipm/f1_f2_ipm_12_6_100000000_10000_42_1_0.5_1.0_0.0.pkl
- __MACOSX/separation_results_final_supp_mat/separation_results_code/res/f1_f2_ipm/._f1_f2_ipm_12_6_100000000_10000_42_1_0.5_1.0_0.0.pkl
- separation_results_final_supp_mat/separation_results_code/res/f1_f2_ipm/f1_f2_ipm_12_6_100000_10000_42_1_0.5_1.0_0.0.pkl
- __MACOSX/separation_results_final_supp_mat/separation_results_code/res/f1_f2_ipm/._f1_f2_ipm_12_6_100000_10000_42_1_0.5_1.0_0.0.pkl
- separation_results_final_supp_mat/separation_results_code/res/f1_f2_ipm/f1_f2_ipm_12_6_2000000_10000_42_1_0.5_1.0_0.0.pkl
- __MACOSX/separation_results_final_supp_mat/separation_results_code/res/f1_f2_ipm/._f1_f2_ipm_12_6_2000000_10000_42_1_0.5_1.0_0.0.pkl
- __MACOSX/separation_results_final_supp_mat/separation_results_code/res/._f1_f2_ipm
- separation_results_final_supp_mat/separation_results_code/res/f1_f2_sliced_w/
- __MACOSX/separation_results_final_supp_mat/separation_results_code/res/._f1_f2_sliced_w
- separation_results_final_supp_mat/separation_results_code/res/.DS_Store
- __MACOSX/separation_results_final_supp_mat/separation_results_code/res/._.DS_Store
- separation_results_final_supp_mat/separation_results_code/res/f1_f2_sd/
- __MACOSX/separation_results_final_supp_mat/separation_results_code/res/._f1_f2_sd
- __MACOSX/separation_results_final_supp_mat/separation_results_code/._res
- separation_results_final_supp_mat/separation_results_code/.DS_Store
- __MACOSX/separation_results_final_supp_mat/separation_results_code/._.DS_Store
- separation_results_final_supp_mat/separation_results_code/f1_f2_sliced_w.py
- __MACOSX/separation_results_final_supp_mat/separation_results_code/._f1_f2_sliced_w.py
- separation_results_final_supp_mat/separation_results_code/f1_f2_sep.slurm
- __MACOSX/separation_results_final_supp_mat/separation_results_code/._f1_f2_sep.slurm
- separation_results_final_supp_mat/separation_results_code/f1_f2_sd.py
- __MACOSX/separation_results_final_supp_mat/separation_results_code/._f1_f2_sd.py
- separation_results_final_supp_mat/separation_results_code/f1_f2_sep.py
- __MACOSX/separation_results_final_supp_mat/separation_results_code/._f1_f2_sep.py
- separation_results_final_supp_mat/separation_results_code/README
- __MACOSX/separation_results_final_supp_mat/separation_results_code/._README
- separation_results_final_supp_mat/separation_results_code/figures.py
- __MACOSX/separation_results_final_supp_mat/separation_results_code/._figures.py
- separation_results_final_supp_mat/separation_results_code/figures/
- separation_results_final_supp_mat/separation_results_code/figures/f1_f2_sliced_w_fig1_1_0.1_100000.pdf
- __MACOSX/separation_results_final_supp_mat/separation_results_code/figures/
- __MACOSX/separation_results_final_supp_mat/separation_results_code/figures/._f1_f2_sliced_w_fig1_1_0.1_100000.pdf
- separation_results_final_supp_mat/separation_results_code/figures/f1_f2_sd_fig1_5_2000000.pdf
- __MACOSX/separation_results_final_supp_mat/separation_results_code/figures/._f1_f2_sd_fig1_5_2000000.pdf
- separation_results_final_supp_mat/separation_results_code/figures/f1_f2_sd_fig2_5_2000000.pdf
- __MACOSX/separation_results_final_supp_mat/separation_results_code/figures/._f1_f2_sd_fig2_5_2000000.pdf
- separation_results_final_supp_mat/separation_results_code/figures/.DS_Store
- __MACOSX/separation_results_final_supp_mat/separation_results_code/figures/._.DS_Store
- separation_results_final_supp_mat/separation_results_code/figures/f1_f2_ipm_fig1_6_4400000000.pdf
- __MACOSX/separation_results_final_supp_mat/separation_results_code/figures/._f1_f2_ipm_fig1_6_4400000000.pdf
- separation_results_final_supp_mat/separation_results_code/figures/f1_f2_ipm_fig2_6_400000000.pdf
- __MACOSX/separation_results_final_supp_mat/separation_results_code/figures/._f1_f2_ipm_fig2_6_400000000.pdf
- separation_results_final_supp_mat/separation_results_code/figures/f1_f2_sd_fig2_5_30000000.pdf
- __MACOSX/separation_results_final_supp_mat/separation_results_code/figures/._f1_f2_sd_fig2_5_30000000.pdf
- separation_results_final_supp_mat/separation_results_code/figures/f1_f2_sd_fig1_5_10000000.pdf
- __MACOSX/separation_results_final_supp_mat/separation_results_code/figures/._f1_f2_sd_fig1_5_10000000.pdf
- separation_results_final_supp_mat/separation_results_code/figures/f1_f2_ipm_fig1_6_10000000.pdf
- __MACOSX/separation_results_final_supp_mat/separation_results_code/figures/._f1_f2_ipm_fig1_6_10000000.pdf
- separation_results_final_supp_mat/separation_results_code/figures/f1_f2_ipm_fig1_6_2200000000.pdf
- __MACOSX/separation_results_final_supp_mat/separation_results_code/figures/._f1_f2_ipm_fig1_6_2200000000.pdf
- separation_results_final_supp_mat/separation_results_code/figures/f1_f2_ipm_fig1_6_600000000.pdf
- __MACOSX/separation_results_final_supp_mat/separation_results_code/figures/._f1_f2_ipm_fig1_6_600000000.pdf
- separation_results_final_supp_mat/separation_results_code/figures/f1_f2_sd_fig1_5_500000.png
- __MACOSX/separation_results_final_supp_mat/separation_results_code/figures/._f1_f2_sd_fig1_5_500000.png
- separation_results_final_supp_mat/separation_results_code/figures/f1_f2_sd_fig2_5_10000000.pdf
- __MACOSX/separation_results_final_supp_mat/separation_results_code/figures/._f1_f2_sd_fig2_5_10000000.pdf
- separation_results_final_supp_mat/separation_results_code/figures/f1_f2_ipm_fig2_6_10000000.pdf
- __MACOSX/separation_results_final_supp_mat/separation_results_code/figures/._f1_f2_ipm_fig2_6_10000000.pdf
- separation_results_final_supp_mat/separation_results_code/figures/f1_f2_sd_fig1_5_500000.pdf
- __MACOSX/separation_results_final_supp_mat/separation_results_code/figures/._f1_f2_sd_fig1_5_500000.pdf
- separation_results_final_supp_mat/separation_results_code/figures/f1_f2_sd_fig1_5_30000000.pdf
- __MACOSX/separation_results_final_supp_mat/separation_results_code/figures/._f1_f2_sd_fig1_5_30000000.pdf
- separation_results_final_supp_mat/separation_results_code/figures/f1_f2_ipm_fig2_6_2200000000.pdf
- __MACOSX/separation_results_final_supp_mat/separation_results_code/figures/._f1_f2_ipm_fig2_6_2200000000.pdf
- separation_results_final_supp_mat/separation_results_code/figures/f1_f2_ipm_fig1_6_400000000.pdf
- __MACOSX/separation_results_final_supp_mat/separation_results_code/figures/._f1_f2_ipm_fig1_6_400000000.pdf
- separation_results_final_supp_mat/separation_results_code/figures/f1_f2_ipm_fig1_6_50000000.pdf
- __MACOSX/separation_results_final_supp_mat/separation_results_code/figures/._f1_f2_ipm_fig1_6_50000000.pdf
- separation_results_final_supp_mat/separation_results_code/figures/f1_f2_sd_fig2_5_500000.png
- __MACOSX/separation_results_final_supp_mat/separation_results_code/figures/._f1_f2_sd_fig2_5_500000.png
- separation_results_final_supp_mat/separation_results_code/figures/f1_f2_sd_fig2_5_500000.pdf
- __MACOSX/separation_results_final_supp_mat/separation_results_code/figures/._f1_f2_sd_fig2_5_500000.pdf
- separation_results_final_supp_mat/separation_results_code/figures/f1_f2_sliced_w_fig2_1_0.1_100000.pdf
- __MACOSX/separation_results_final_supp_mat/separation_results_code/figures/._f1_f2_sliced_w_fig2_1_0.1_100000.pdf
- separation_results_final_supp_mat/separation_results_code/figures/f1_f2_ipm_fig2_6_50000000.pdf
- __MACOSX/separation_results_final_supp_mat/separation_results_code/figures/._f1_f2_ipm_fig2_6_50000000.pdf
- separation_results_final_supp_mat/separation_results_code/figures/f1_f2_ipm_fig2_6_4400000000.pdf
- __MACOSX/separation_results_final_supp_mat/separation_results_code/figures/._f1_f2_ipm_fig2_6_4400000000.pdf
- separation_results_final_supp_mat/separation_results_code/figures/f1_f2_ipm_fig2_6_600000000.pdf
- __MACOSX/separation_results_final_supp_mat/separation_results_code/figures/._f1_f2_ipm_fig2_6_600000000.pdf
- __MACOSX/separation_results_final_supp_mat/separation_results_code/._figures
- separation_results_final_supp_mat/separation_results_code/.ipynb_checkpoints/
- separation_results_final_supp_mat/separation_results_code/.ipynb_checkpoints/f1_f2_sep_0-checkpoint.ipynb
- __MACOSX/separation_results_final_supp_mat/separation_results_code/.ipynb_checkpoints/
- __MACOSX/separation_results_final_supp_mat/separation_results_code/.ipynb_checkpoints/._f1_f2_sep_0-checkpoint.ipynb
- __MACOSX/separation_results_final_supp_mat/separation_results_code/._.ipynb_checkpoints
- separation_results_final_supp_mat/separation_results_code/.git/
- separation_results_final_supp_mat/separation_results_code/.git/ORIG_HEAD
- __MACOSX/separation_results_final_supp_mat/separation_results_code/.git/
- __MACOSX/separation_results_final_supp_mat/separation_results_code/.git/._ORIG_HEAD
- separation_results_final_supp_mat/separation_results_code/.git/config
- __MACOSX/separation_results_final_supp_mat/separation_results_code/.git/._config
- separation_results_final_supp_mat/separation_results_code/.git/objects/
- separation_results_final_supp_mat/separation_results_code/.git/objects/0c/
- separation_results_final_supp_mat/separation_results_code/.git/objects/0c/7d9e14bd3a1c33f1f602795ad11cc3e2364a13
- __MACOSX/separation_results_final_supp_mat/separation_results_code/.git/objects/
- __MACOSX/separation_results_final_supp_mat/separation_results_code/.git/objects/0c/
- __MACOSX/separation_results_final_supp_mat/separation_results_code/.git/objects/0c/._7d9e14bd3a1c33f1f602795ad11cc3e2364a13
- __MACOSX/separation_results_final_supp_mat/separation_results_code/.git/objects/._0c
- separation_results_final_supp_mat/separation_results_code/.git/objects/3e/
- separation_results_final_supp_mat/separation_results_code/.git/objects/3e/465a2a4e19920622e70bdef9a4e90d4cbd020b
- __MACOSX/separation_results_final_supp_mat/separation_results_code/.git/objects/3e/
- __MACOSX/separation_results_final_supp_mat/separation_results_code/.git/objects/3e/._465a2a4e19920622e70bdef9a4e90d4cbd020b
- __MACOSX/separation_results_final_supp_mat/separation_results_code/.git/objects/._3e
- separation_results_final_supp_mat/separation_results_code/.git/objects/04/
- separation_results_final_supp_mat/separation_results_code/.git/objects/04/c470986c49843623e02ce6c45a8f26fdd774b3
- __MACOSX/separation_results_final_supp_mat/separation_results_code/.git/objects/04/
- __MACOSX/separation_results_final_supp_mat/separation_results_code/.git/objects/04/._c470986c49843623e02ce6c45a8f26fdd774b3
- __MACOSX/separation_results_final_supp_mat/separation_results_code/.git/objects/._04
- separation_results_final_supp_mat/separation_results_code/.git/objects/93/
- separation_results_final_supp_mat/separation_results_code/.git/objects/93/1409a72b09f34ac0a41520e417912a6d63701b
- __MACOSX/separation_results_final_supp_mat/separation_results_code/.git/objects/93/
- __MACOSX/separation_results_final_supp_mat/separation_results_code/.git/objects/93/._1409a72b09f34ac0a41520e417912a6d63701b
- __MACOSX/separation_results_final_supp_mat/separation_results_code/.git/objects/._93
- separation_results_final_supp_mat/separation_results_code/.git/objects/5f/
- separation_results_final_supp_mat/separation_results_code/.git/objects/5f/3c0db908d386d139037b9c23f87e1bad8c1471
- __MACOSX/separation_results_final_supp_mat/separation_results_code/.git/objects/5f/
- __MACOSX/separation_results_final_supp_mat/separation_results_code/.git/objects/5f/._3c0db908d386d139037b9c23f87e1bad8c1471
- separation_results_final_supp_mat/separation_results_code/.git/objects/5f/e2608f5851bf619e3bdfc22fd341584146ca69
- __MACOSX/separation_results_final_supp_mat/separation_results_code/.git/objects/5f/._e2608f5851bf619e3bdfc22fd341584146ca69
- __MACOSX/separation_results_final_supp_mat/separation_results_code/.git/objects/._5f
- separation_results_final_supp_mat/separation_results_code/.git/objects/02/
- separation_results_final_supp_mat/separation_results_code/.git/objects/02/5ddf748ed5479d85152375e5d35563d6369662
- __MACOSX/separation_results_final_supp_mat/separation_results_code/.git/objects/02/
- __MACOSX/separation_results_final_supp_mat/separation_results_code/.git/objects/02/._5ddf748ed5479d85152375e5d35563d6369662
- __MACOSX/separation_results_final_supp_mat/separation_results_code/.git/objects/._02
- separation_results_final_supp_mat/separation_results_code/.git/objects/b5/
- separation_results_final_supp_mat/separation_results_code/.git/objects/b5/81091404b6a08b9d6d2040fb279a57a41d9971
- __MACOSX/separation_results_final_supp_mat/separation_results_code/.git/objects/b5/
- __MACOSX/separation_results_final_supp_mat/separation_results_code/.git/objects/b5/._81091404b6a08b9d6d2040fb279a57a41d9971
- __MACOSX/separation_results_final_supp_mat/separation_results_code/.git/objects/._b5
- separation_results_final_supp_mat/separation_results_code/.git/objects/d0/
- separation_results_final_supp_mat/separation_results_code/.git/objects/d0/5abe357196fac2d91d422f49504fffe903fa83
- __MACOSX/separation_results_final_supp_mat/separation_results_code/.git/objects/d0/
- __MACOSX/separation_results_final_supp_mat/separation_results_code/.git/objects/d0/._5abe357196fac2d91d422f49504fffe903fa83
- __MACOSX/separation_results_final_supp_mat/separation_results_code/.git/objects/._d0
- separation_results_final_supp_mat/separation_results_code/.git/objects/bd/
- separation_results_final_supp_mat/separation_results_code/.git/objects/bd/094e6cfb6188ffd9e87162bfe79a81da14273f
- __MACOSX/separation_results_final_supp_mat/separation_results_code/.git/objects/bd/
- __MACOSX/separation_results_final_supp_mat/separation_results_code/.git/objects/bd/._094e6cfb6188ffd9e87162bfe79a81da14273f
- __MACOSX/separation_results_final_supp_mat/separation_results_code/.git/objects/._bd
- separation_results_final_supp_mat/separation_results_code/.git/objects/bc/
- separation_results_final_supp_mat/separation_results_code/.git/objects/bc/455ae5974a38ab1bd847540e9b6cb0c625849d
- __MACOSX/separation_results_final_supp_mat/separation_results_code/.git/objects/bc/
- __MACOSX/separation_results_final_supp_mat/separation_results_code/.git/objects/bc/._455ae5974a38ab1bd847540e9b6cb0c625849d
- __MACOSX/separation_results_final_supp_mat/separation_results_code/.git/objects/._bc
- separation_results_final_supp_mat/separation_results_code/.git/objects/f4/
- separation_results_final_supp_mat/separation_results_code/.git/objects/f4/a59adbc040793d288da41cc4236b3656fac065
- __MACOSX/separation_results_final_supp_mat/separation_results_code/.git/objects/f4/
- __MACOSX/separation_results_final_supp_mat/separation_results_code/.git/objects/f4/._a59adbc040793d288da41cc4236b3656fac065
- __MACOSX/separation_results_final_supp_mat/separation_results_code/.git/objects/._f4
- separation_results_final_supp_mat/separation_results_code/.git/objects/f3/
- separation_results_final_supp_mat/separation_results_code/.git/objects/f3/beb7ad2c36b58722ca07c74e6c3ba144eb7101
- __MACOSX/separation_results_final_supp_mat/separation_results_code/.git/objects/f3/
- __MACOSX/separation_results_final_supp_mat/separation_results_code/.git/objects/f3/._beb7ad2c36b58722ca07c74e6c3ba144eb7101
- __MACOSX/separation_results_final_supp_mat/separation_results_code/.git/objects/._f3
- separation_results_final_supp_mat/separation_results_code/.git/objects/e3/
- separation_results_final_supp_mat/separation_results_code/.git/objects/e3/8971f97924e8b3d1cb1b2c1c19fd60bf0c63dc
- __MACOSX/separation_results_final_supp_mat/separation_results_code/.git/objects/e3/
- __MACOSX/separation_results_final_supp_mat/separation_results_code/.git/objects/e3/._8971f97924e8b3d1cb1b2c1c19fd60bf0c63dc
- __MACOSX/separation_results_final_supp_mat/separation_results_code/.git/objects/._e3
- separation_results_final_supp_mat/separation_results_code/.git/objects/cf/
- separation_results_final_supp_mat/separation_results_code/.git/objects/cf/8594ca31aecce296d7e3a2e599b6917b1c50d7
- __MACOSX/separation_results_final_supp_mat/separation_results_code/.git/objects/cf/
- __MACOSX/separation_results_final_supp_mat/separation_results_code/.git/objects/cf/._8594ca31aecce296d7e3a2e599b6917b1c50d7
- __MACOSX/separation_results_final_supp_mat/separation_results_code/.git/objects/._cf
- separation_results_final_supp_mat/separation_results_code/.git/objects/pack/
- __MACOSX/separation_results_final_supp_mat/separation_results_code/.git/objects/._pack
- separation_results_final_supp_mat/separation_results_code/.git/objects/7c/
- separation_results_final_supp_mat/separation_results_code/.git/objects/7c/eae8499ec25b80922594fefab630b9de8f41fb
- __MACOSX/separation_results_final_supp_mat/separation_results_code/.git/objects/7c/
- __MACOSX/separation_results_final_supp_mat/separation_results_code/.git/objects/7c/._eae8499ec25b80922594fefab630b9de8f41fb
- separation_results_final_supp_mat/separation_results_code/.git/objects/7c/911113fcd5cf6c411eff23fea11d58a4dbb835
- __MACOSX/separation_results_final_supp_mat/separation_results_code/.git/objects/7c/._911113fcd5cf6c411eff23fea11d58a4dbb835
- __MACOSX/separation_results_final_supp_mat/separation_results_code/.git/objects/._7c
- separation_results_final_supp_mat/separation_results_code/.git/objects/89/
- separation_results_final_supp_mat/separation_results_code/.git/objects/89/e168de6d2ed2e79df886c906e00807dbe0f71f
- __MACOSX/separation_results_final_supp_mat/separation_results_code/.git/objects/89/
- __MACOSX/separation_results_final_supp_mat/separation_results_code/.git/objects/89/._e168de6d2ed2e79df886c906e00807dbe0f71f
- __MACOSX/separation_results_final_supp_mat/separation_results_code/.git/objects/._89
- separation_results_final_supp_mat/separation_results_code/.git/objects/45/
- separation_results_final_supp_mat/separation_results_code/.git/objects/45/b51ea406b14efb3bb01bcd6d7cca0fe815ea3c
- __MACOSX/separation_results_final_supp_mat/separation_results_code/.git/objects/45/
- __MACOSX/separation_results_final_supp_mat/separation_results_code/.git/objects/45/._b51ea406b14efb3bb01bcd6d7cca0fe815ea3c
- __MACOSX/separation_results_final_supp_mat/separation_results_code/.git/objects/._45
- separation_results_final_supp_mat/separation_results_code/.git/objects/17/
- separation_results_final_supp_mat/separation_results_code/.git/objects/17/20e642518db350993e494a8c5e38075ef64dfd
- __MACOSX/separation_results_final_supp_mat/separation_results_code/.git/objects/17/
- __MACOSX/separation_results_final_supp_mat/separation_results_code/.git/objects/17/._20e642518db350993e494a8c5e38075ef64dfd
- __MACOSX/separation_results_final_supp_mat/separation_results_code/.git/objects/._17
- separation_results_final_supp_mat/separation_results_code/.git/objects/26/
- separation_results_final_supp_mat/separation_results_code/.git/objects/26/c0a8f122c228fbb55baf0a23708f413109149f
- __MACOSX/separation_results_final_supp_mat/separation_results_code/.git/objects/26/
- __MACOSX/separation_results_final_supp_mat/separation_results_code/.git/objects/26/._c0a8f122c228fbb55baf0a23708f413109149f
- __MACOSX/separation_results_final_supp_mat/separation_results_code/.git/objects/._26
- separation_results_final_supp_mat/separation_results_code/.git/objects/21/
- separation_results_final_supp_mat/separation_results_code/.git/objects/21/01956e2aacf47d65b87cf0ade2cc959b33f365
- __MACOSX/separation_results_final_supp_mat/separation_results_code/.git/objects/21/
- __MACOSX/separation_results_final_supp_mat/separation_results_code/.git/objects/21/._01956e2aacf47d65b87cf0ade2cc959b33f365
- __MACOSX/separation_results_final_supp_mat/separation_results_code/.git/objects/._21
- separation_results_final_supp_mat/separation_results_code/.git/objects/4d/
- separation_results_final_supp_mat/separation_results_code/.git/objects/4d/4267bea7d01eb8dfae45e035aac0cc50a3ce95
- __MACOSX/separation_results_final_supp_mat/separation_results_code/.git/objects/4d/
- __MACOSX/separation_results_final_supp_mat/separation_results_code/.git/objects/4d/._4267bea7d01eb8dfae45e035aac0cc50a3ce95
- __MACOSX/separation_results_final_supp_mat/separation_results_code/.git/objects/._4d
- separation_results_final_supp_mat/separation_results_code/.git/objects/2f/
- separation_results_final_supp_mat/separation_results_code/.git/objects/2f/ae3f73f3a16b63850a0a83ffa054186e14aea8
- __MACOSX/separation_results_final_supp_mat/separation_results_code/.git/objects/2f/
- __MACOSX/separation_results_final_supp_mat/separation_results_code/.git/objects/2f/._ae3f73f3a16b63850a0a83ffa054186e14aea8
- __MACOSX/separation_results_final_supp_mat/separation_results_code/.git/objects/._2f
- separation_results_final_supp_mat/separation_results_code/.git/objects/6b/
- separation_results_final_supp_mat/separation_results_code/.git/objects/6b/58ecd2ba4d1d49d98bd365e7a43e3b55c5e069
- __MACOSX/separation_results_final_supp_mat/separation_results_code/.git/objects/6b/
- __MACOSX/separation_results_final_supp_mat/separation_results_code/.git/objects/6b/._58ecd2ba4d1d49d98bd365e7a43e3b55c5e069
- separation_results_final_supp_mat/separation_results_code/.git/objects/6b/28c5a17c8321a78a749ccf8f2e82e4f2ce49a2
- __MACOSX/separation_results_final_supp_mat/separation_results_code/.git/objects/6b/._28c5a17c8321a78a749ccf8f2e82e4f2ce49a2
- __MACOSX/separation_results_final_supp_mat/separation_results_code/.git/objects/._6b
- separation_results_final_supp_mat/separation_results_code/.git/objects/00/
- separation_results_final_supp_mat/separation_results_code/.git/objects/00/a3b8cfe6e417585895156b03e5029028087126
- __MACOSX/separation_results_final_supp_mat/separation_results_code/.git/objects/00/
- __MACOSX/separation_results_final_supp_mat/separation_results_code/.git/objects/00/._a3b8cfe6e417585895156b03e5029028087126
- __MACOSX/separation_results_final_supp_mat/separation_results_code/.git/objects/._00
- separation_results_final_supp_mat/separation_results_code/.git/objects/31/
- separation_results_final_supp_mat/separation_results_code/.git/objects/31/7d847cc05049bdb5a97d534028efa921080278
- __MACOSX/separation_results_final_supp_mat/separation_results_code/.git/objects/31/
- __MACOSX/separation_results_final_supp_mat/separation_results_code/.git/objects/31/._7d847cc05049bdb5a97d534028efa921080278
- __MACOSX/separation_results_final_supp_mat/separation_results_code/.git/objects/._31
- separation_results_final_supp_mat/separation_results_code/.git/objects/info/
- __MACOSX/separation_results_final_supp_mat/separation_results_code/.git/objects/._info
- separation_results_final_supp_mat/separation_results_code/.git/objects/65/
- separation_results_final_supp_mat/separation_results_code/.git/objects/65/2920df744b0aa1632fbffa47fb46b50692d001
- __MACOSX/separation_results_final_supp_mat/separation_results_code/.git/objects/65/
- __MACOSX/separation_results_final_supp_mat/separation_results_code/.git/objects/65/._2920df744b0aa1632fbffa47fb46b50692d001
- __MACOSX/separation_results_final_supp_mat/separation_results_code/.git/objects/._65
- separation_results_final_supp_mat/separation_results_code/.git/objects/62/
- separation_results_final_supp_mat/separation_results_code/.git/objects/62/189d42261e8316c60f3575c68ffa27ff660256
- __MACOSX/separation_results_final_supp_mat/separation_results_code/.git/objects/62/
- __MACOSX/separation_results_final_supp_mat/separation_results_code/.git/objects/62/._189d42261e8316c60f3575c68ffa27ff660256
- __MACOSX/separation_results_final_supp_mat/separation_results_code/.git/objects/._62
- separation_results_final_supp_mat/separation_results_code/.git/objects/98/
- separation_results_final_supp_mat/separation_results_code/.git/objects/98/efe6d2e54e7b1c1aff21bbe2ec3e49598c438b
- __MACOSX/separation_results_final_supp_mat/separation_results_code/.git/objects/98/
- __MACOSX/separation_results_final_supp_mat/separation_results_code/.git/objects/98/._efe6d2e54e7b1c1aff21bbe2ec3e49598c438b
- __MACOSX/separation_results_final_supp_mat/separation_results_code/.git/objects/._98
- separation_results_final_supp_mat/separation_results_code/.git/objects/53/
- separation_results_final_supp_mat/separation_results_code/.git/objects/53/bc78f33affab8ddc6c57cbc55a363f1035b8ea
- __MACOSX/separation_results_final_supp_mat/separation_results_code/.git/objects/53/
- __MACOSX/separation_results_final_supp_mat/separation_results_code/.git/objects/53/._bc78f33affab8ddc6c57cbc55a363f1035b8ea
- __MACOSX/separation_results_final_supp_mat/separation_results_code/.git/objects/._53
- separation_results_final_supp_mat/separation_results_code/.git/objects/3f/
- separation_results_final_supp_mat/separation_results_code/.git/objects/3f/b966ea4954d48fb50ceeb6735815189162e4df
- __MACOSX/separation_results_final_supp_mat/separation_results_code/.git/objects/3f/
- __MACOSX/separation_results_final_supp_mat/separation_results_code/.git/objects/3f/._b966ea4954d48fb50ceeb6735815189162e4df
- __MACOSX/separation_results_final_supp_mat/separation_results_code/.git/objects/._3f
- separation_results_final_supp_mat/separation_results_code/.git/objects/5e/
- separation_results_final_supp_mat/separation_results_code/.git/objects/5e/dbeda1916f6b6e9ed75221e514b343d3e9b396
- __MACOSX/separation_results_final_supp_mat/separation_results_code/.git/objects/5e/
- __MACOSX/separation_results_final_supp_mat/separation_results_code/.git/objects/5e/._dbeda1916f6b6e9ed75221e514b343d3e9b396
- __MACOSX/separation_results_final_supp_mat/separation_results_code/.git/objects/._5e
- separation_results_final_supp_mat/separation_results_code/.git/objects/5b/
- separation_results_final_supp_mat/separation_results_code/.git/objects/5b/43e508d580a689ec2d2615cd98ad9544da81c6
- __MACOSX/separation_results_final_supp_mat/separation_results_code/.git/objects/5b/
- __MACOSX/separation_results_final_supp_mat/separation_results_code/.git/objects/5b/._43e508d580a689ec2d2615cd98ad9544da81c6
- __MACOSX/separation_results_final_supp_mat/separation_results_code/.git/objects/._5b
- separation_results_final_supp_mat/separation_results_code/.git/objects/39/
- separation_results_final_supp_mat/separation_results_code/.git/objects/39/a212b01276ac20e31b2874e2dd2a1ddf48fc57
- __MACOSX/separation_results_final_supp_mat/separation_results_code/.git/objects/39/
- __MACOSX/separation_results_final_supp_mat/separation_results_code/.git/objects/39/._a212b01276ac20e31b2874e2dd2a1ddf48fc57
- __MACOSX/separation_results_final_supp_mat/separation_results_code/.git/objects/._39
- separation_results_final_supp_mat/separation_results_code/.git/objects/55/
- separation_results_final_supp_mat/separation_results_code/.git/objects/55/0b4ef93371d94499a3fd2e2fcbee783fd38bab
- __MACOSX/separation_results_final_supp_mat/separation_results_code/.git/objects/55/
- __MACOSX/separation_results_final_supp_mat/separation_results_code/.git/objects/55/._0b4ef93371d94499a3fd2e2fcbee783fd38bab
- __MACOSX/separation_results_final_supp_mat/separation_results_code/.git/objects/._55
- separation_results_final_supp_mat/separation_results_code/.git/objects/d4/
- separation_results_final_supp_mat/separation_results_code/.git/objects/d4/a594c3f7e364ee117d2d0a6c91976ed35f8cc0
- __MACOSX/separation_results_final_supp_mat/separation_results_code/.git/objects/d4/
- __MACOSX/separation_results_final_supp_mat/separation_results_code/.git/objects/d4/._a594c3f7e364ee117d2d0a6c91976ed35f8cc0
- __MACOSX/separation_results_final_supp_mat/separation_results_code/.git/objects/._d4
[truncated: 164 more entries]
