# Supplementary material
Source: ML conference proceedings conference paper supplement (https://proceedings.neurips.cc/paper_files/paper/2021/hash/a081c174f5913958ba8c6443bacffcb9-Abstract.html)
Supplement: Supplementary file 1 [file a081c174f5913958ba8c6443bacffcb9-Supplemental.zip › separation_results_final_supp_mat/separation_results_code/README]

This folder is contains the Python scripts to generate the plots in the paper "Separation Results between Fixed-Kernel and Feature-Learning Probability Metrics".
The file f1_f2_sep.py contains the code to generate the data for Figure 1, and it can be executed in an HPC cluster using f1_f2_sep.slurm.
The file f1_f2_sd.py contains the code to generate the data for Figure 2, and it can be executed in an HPC cluste
r using f1_f2_sd.slurm.
The file f1_f2_sliced_w.py contains the code to generate the data for Figure 3, and it can be executed in an HPC cluster using f1_f2_sliced_w.slurm.
The file figures.py generates the figures and stores them in the folder figures.
