# Supplementary material
Source: ML conference proceedings conference paper supplement (https://proceedings.neurips.cc/paper_files/paper/2021/hash/a081c174f5913958ba8c6443bacffcb9-Abstract.html)

$F_1$ ,  $F_2$  IPM vs. sliced Wasserstein

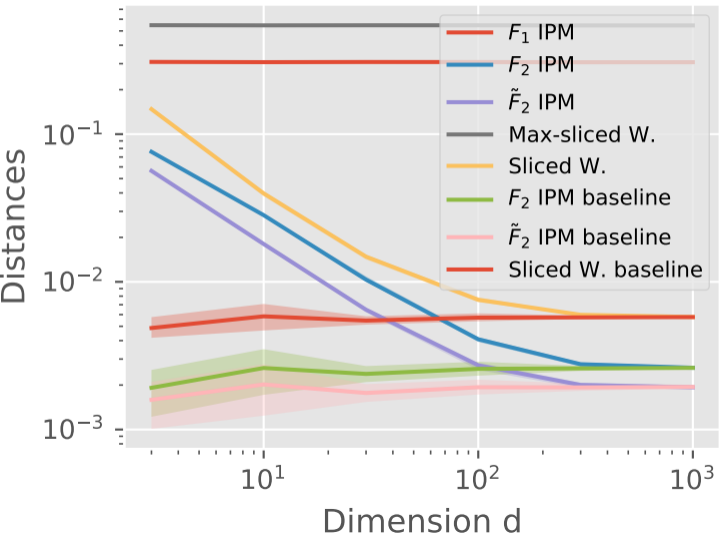

Supplement: Supplementary file 1 [file a081c174f5913958ba8c6443bacffcb9-Supplemental.zip › separation_results_final_supp_mat/separation_results_code/figures/f1_f2_sliced_w_fig1_1_0.1_100000.pdf]

$F_1$  and  $F_2$  SD estimates ( $k = 5$ )

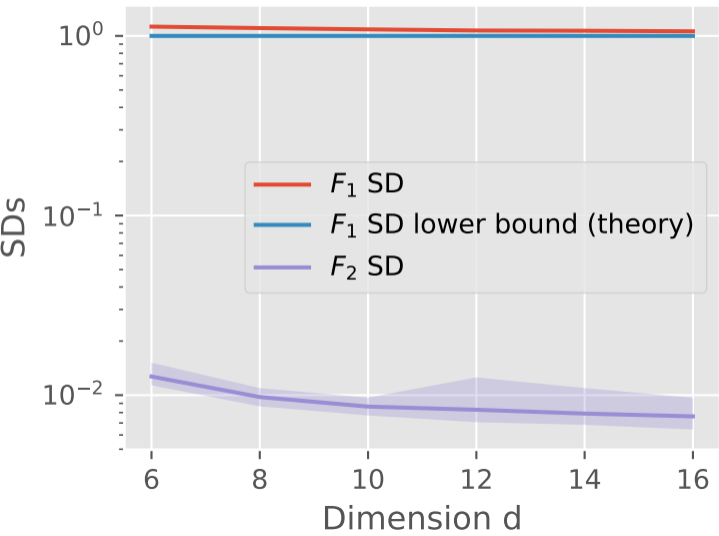

Supplement: Supplementary file 1 [file a081c174f5913958ba8c6443bacffcb9-Supplemental.zip › separation_results_final_supp_mat/separation_results_code/figures/f1_f2_sd_fig1_5_2000000.pdf]

Ratios  $F_1$  SD /  $F_2$  SD ( $k=5$ )

Ratios

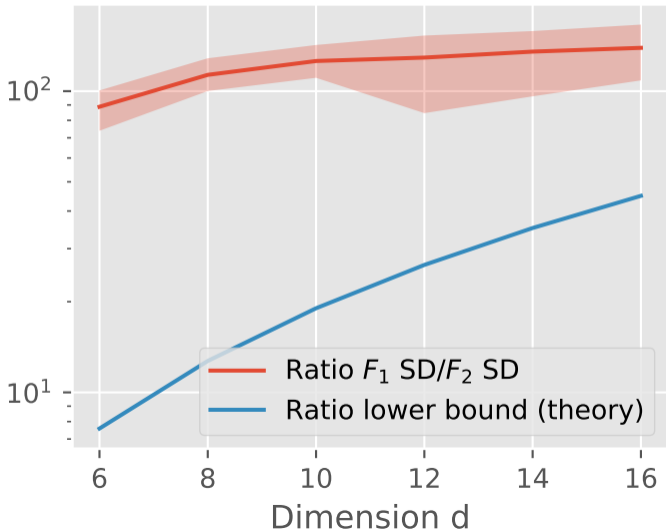

Supplement: Supplementary file 1 [file a081c174f5913958ba8c6443bacffcb9-Supplemental.zip › separation_results_final_supp_mat/separation_results_code/figures/f1_f2_sd_fig2_5_2000000.pdf]

# $F_1$ and $F_2$ IPM estimates ( $k = 6$ )

IPMs

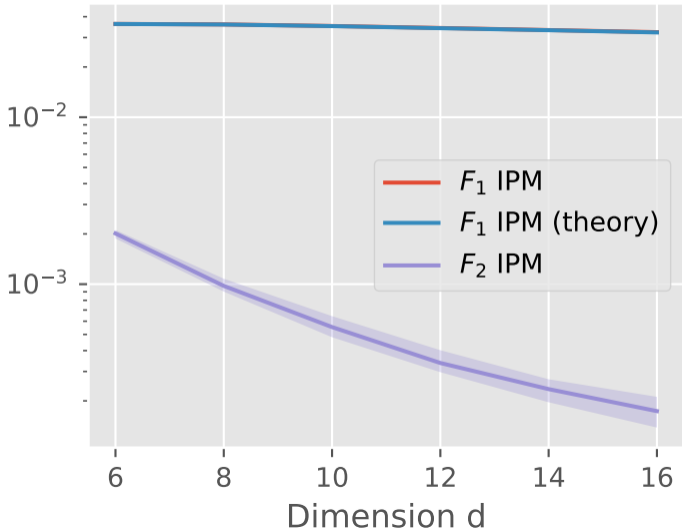

Supplement: Supplementary file 1 [file a081c174f5913958ba8c6443bacffcb9-Supplemental.zip › separation_results_final_supp_mat/separation_results_code/figures/f1_f2_ipm_fig1_6_4400000000.pdf]

# Ratios between $F_1$ and $F_2$ IPM estimates ( $k = 6$ )

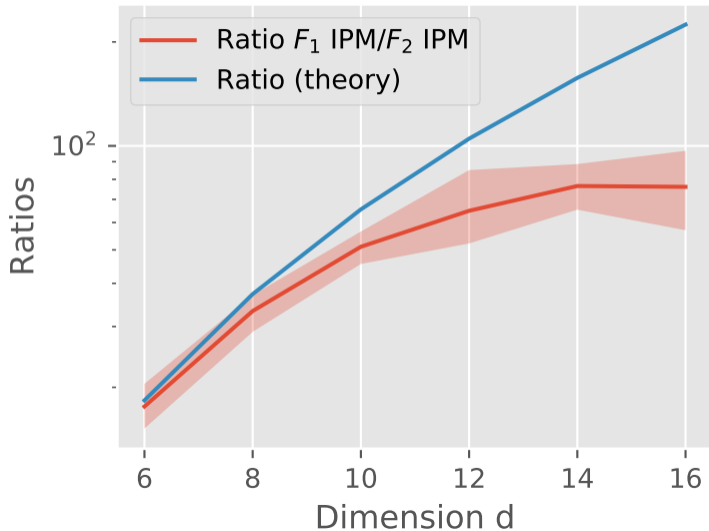

Supplement: Supplementary file 1 [file a081c174f5913958ba8c6443bacffcb9-Supplemental.zip › separation_results_final_supp_mat/separation_results_code/figures/f1_f2_ipm_fig2_6_400000000.pdf]

# Ratios $F_1$ SD / $F_2$ SD ( $k=5$ )

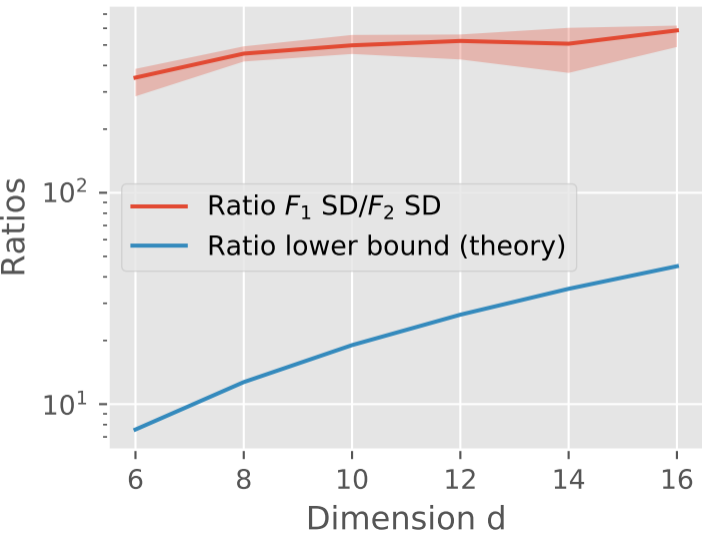

Supplement: Supplementary file 1 [file a081c174f5913958ba8c6443bacffcb9-Supplemental.zip › separation_results_final_supp_mat/separation_results_code/figures/f1_f2_sd_fig2_5_30000000.pdf]

# $F_1$ and $F_2$ SD estimates ( $k = 5$ )

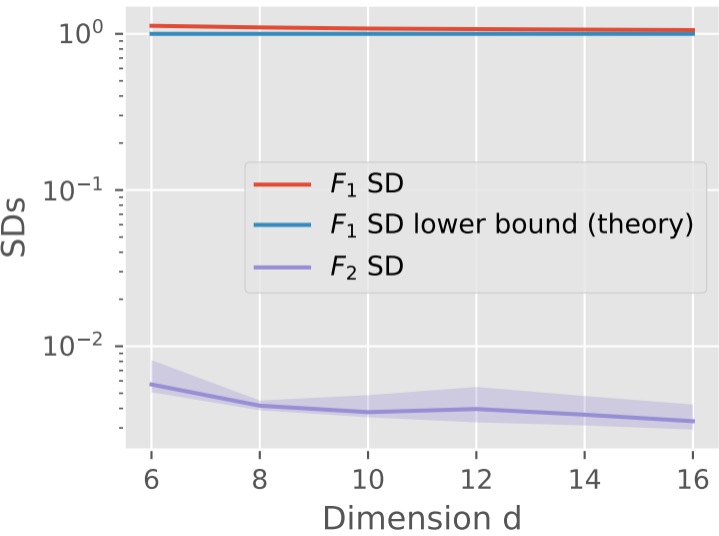

Supplement: Supplementary file 1 [file a081c174f5913958ba8c6443bacffcb9-Supplemental.zip › separation_results_final_supp_mat/separation_results_code/figures/f1_f2_sd_fig1_5_10000000.pdf]

# $F_1$ and $F_2$ IPM estimates ( $k = 6$ )

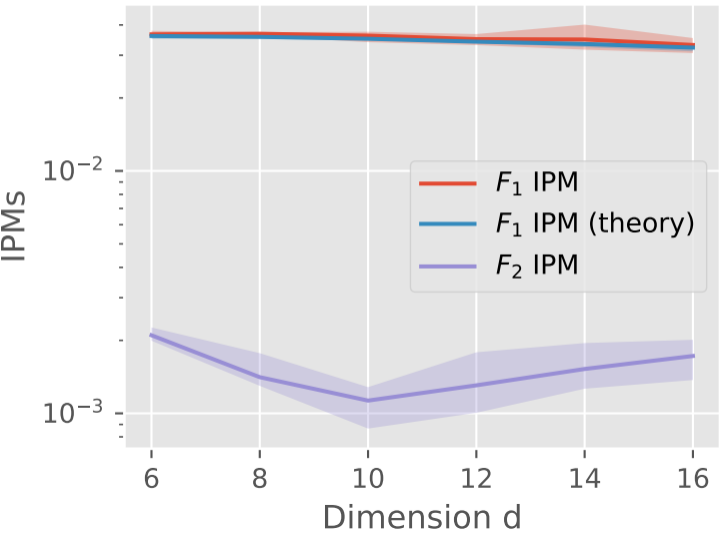

Supplement: Supplementary file 1 [file a081c174f5913958ba8c6443bacffcb9-Supplemental.zip › separation_results_final_supp_mat/separation_results_code/figures/f1_f2_ipm_fig1_6_10000000.pdf]

# $F_1$ and $F_2$ IPM estimates ( $k = 6$ )

IPMs

$10^{-2}$

$10^{-3}$

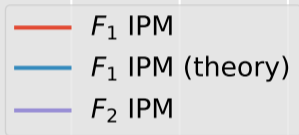

Dimension d

Supplement: Supplementary file 1 [file a081c174f5913958ba8c6443bacffcb9-Supplemental.zip › separation_results_final_supp_mat/separation_results_code/figures/f1_f2_ipm_fig1_6_2200000000.pdf]

# $F_1$ and $F_2$ IPM estimates ( $k = 6$ )

IPMs

$10^{-2}$

$10^{-3}$

6

8

10

12

14

16

Dimension  $d$

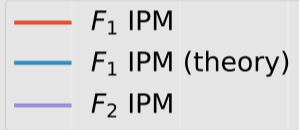

Supplement: Supplementary file 1 [file a081c174f5913958ba8c6443bacffcb9-Supplemental.zip › separation_results_final_supp_mat/separation_results_code/figures/f1_f2_ipm_fig1_6_600000000.pdf]

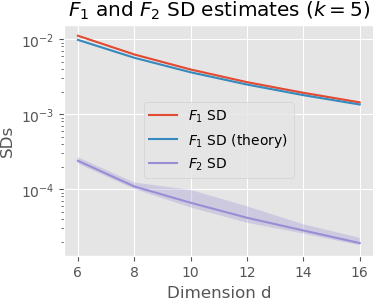

Supplement: Supplementary file 1 [file a081c174f5913958ba8c6443bacffcb9-Supplemental.zip › separation_results_final_supp_mat/separation_results_code/figures/f1_f2_sd_fig1_5_500000.png]

Ratios  $F_1$  SD /  $F_2$  SD ( $k=5$ )

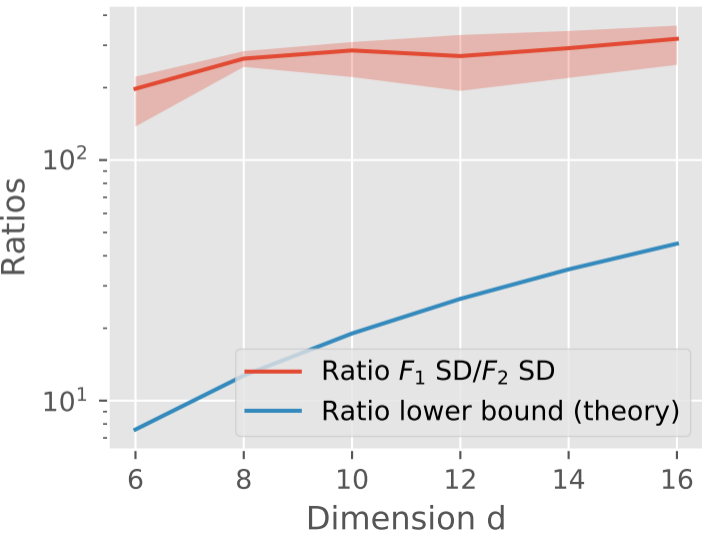

Supplement: Supplementary file 1 [file a081c174f5913958ba8c6443bacffcb9-Supplemental.zip › separation_results_final_supp_mat/separation_results_code/figures/f1_f2_sd_fig2_5_10000000.pdf]

# Ratios between $F_1$ and $F_2$ IPM estimates ( $k = 6$ )

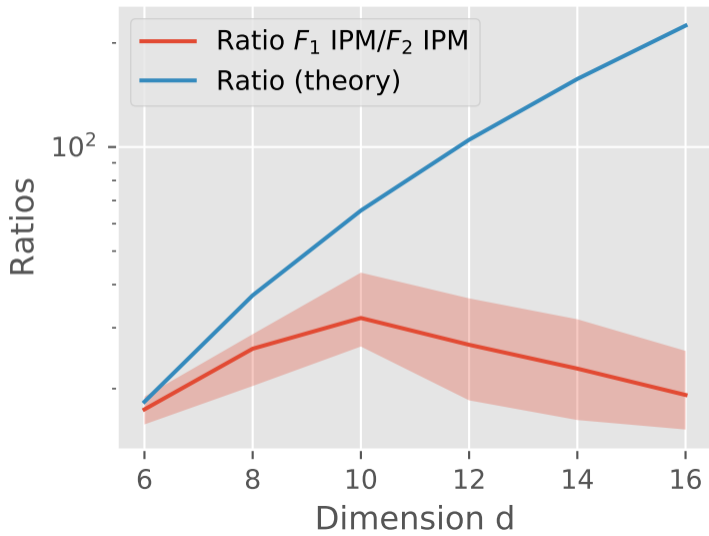

Supplement: Supplementary file 1 [file a081c174f5913958ba8c6443bacffcb9-Supplemental.zip › separation_results_final_supp_mat/separation_results_code/figures/f1_f2_ipm_fig2_6_10000000.pdf]

$F_1$  and  $F_2$  SD estimates ( $k = 5$ )

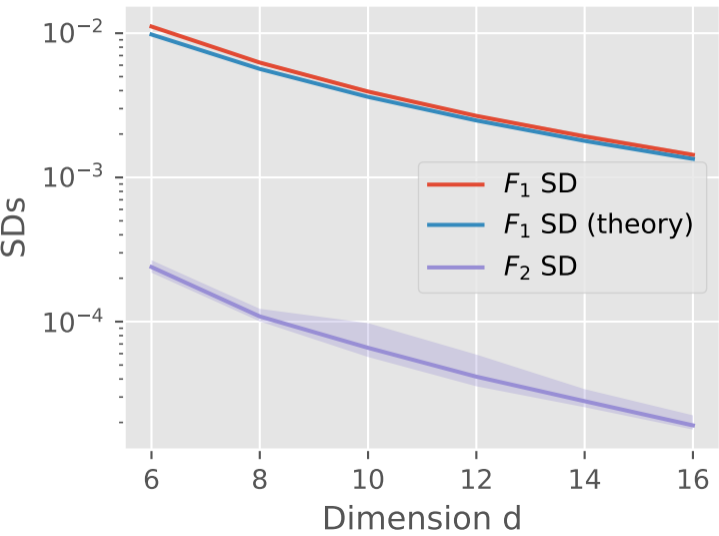

Supplement: Supplementary file 1 [file a081c174f5913958ba8c6443bacffcb9-Supplemental.zip › separation_results_final_supp_mat/separation_results_code/figures/f1_f2_sd_fig1_5_500000.pdf]

# $F_1$ and $F_2$ SD estimates ( $k = 5$ )

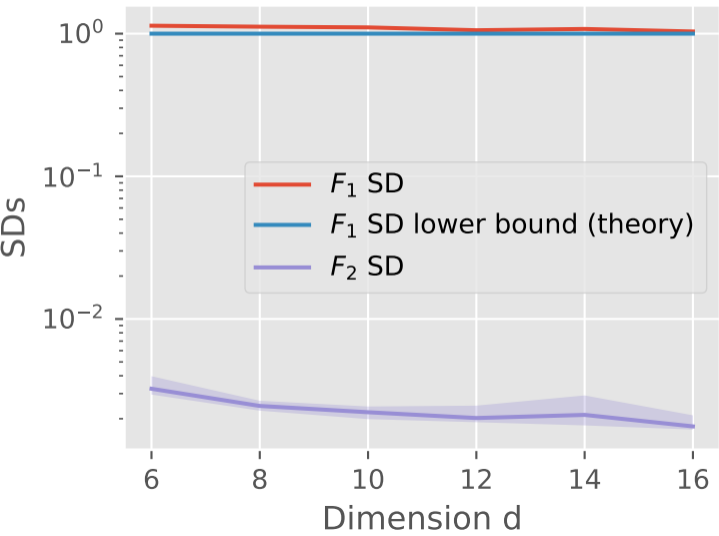

Supplement: Supplementary file 1 [file a081c174f5913958ba8c6443bacffcb9-Supplemental.zip › separation_results_final_supp_mat/separation_results_code/figures/f1_f2_sd_fig1_5_30000000.pdf]

# Ratios $F_1$ IPM / $F_2$ IPM ( $k = 6$ )

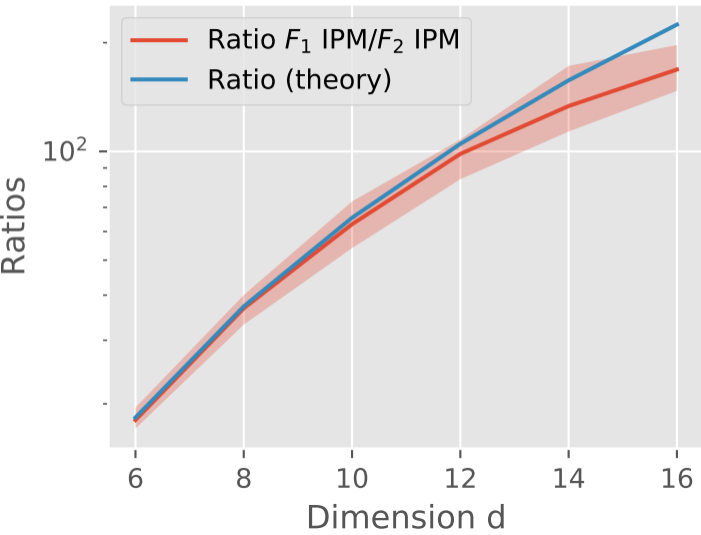

Supplement: Supplementary file 1 [file a081c174f5913958ba8c6443bacffcb9-Supplemental.zip › separation_results_final_supp_mat/separation_results_code/figures/f1_f2_ipm_fig2_6_2200000000.pdf]

# $F_1$ and $F_2$ IPM estimates ( $k = 6$ )

IPMs

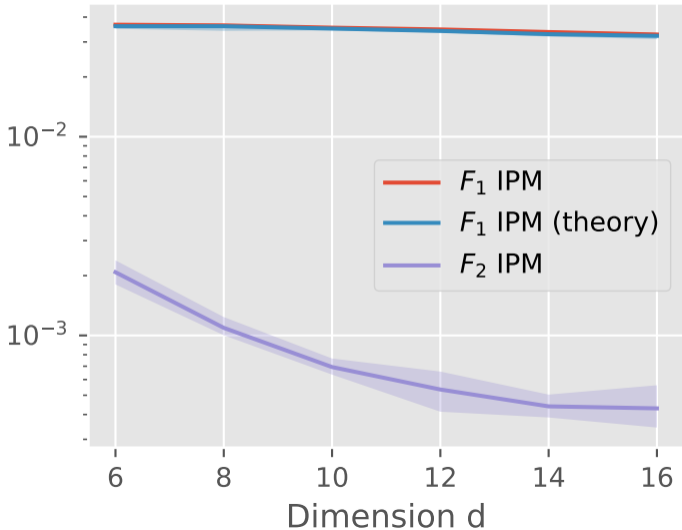

Supplement: Supplementary file 1 [file a081c174f5913958ba8c6443bacffcb9-Supplemental.zip › separation_results_final_supp_mat/separation_results_code/figures/f1_f2_ipm_fig1_6_400000000.pdf]

# $F_1$ and $F_2$ IPM estimates ( $k = 6$ )

IPMs

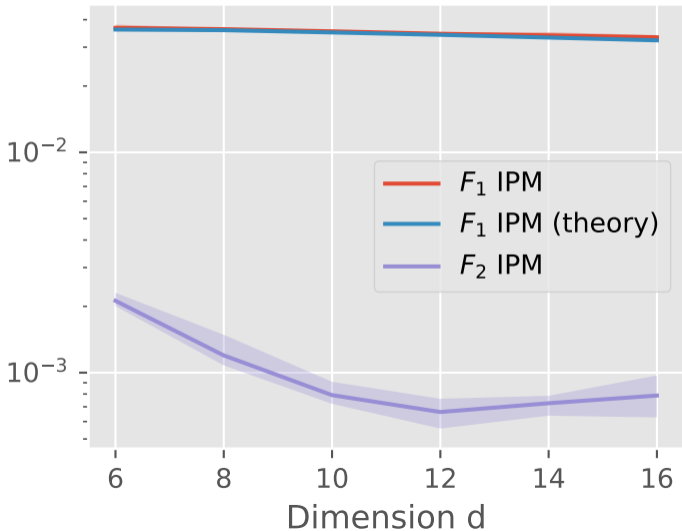

Supplement: Supplementary file 1 [file a081c174f5913958ba8c6443bacffcb9-Supplemental.zip › separation_results_final_supp_mat/separation_results_code/figures/f1_f2_ipm_fig1_6_50000000.pdf]

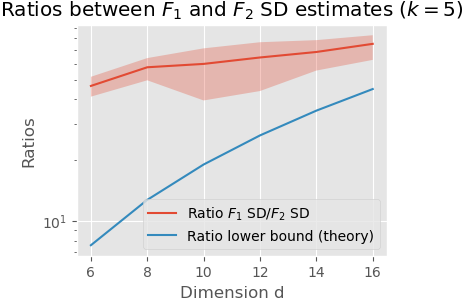

Supplement: Supplementary file 1 [file a081c174f5913958ba8c6443bacffcb9-Supplemental.zip › separation_results_final_supp_mat/separation_results_code/figures/f1_f2_sd_fig2_5_500000.png]

# Ratios $F_1$ SD / $F_2$ SD ( $k=5$ )

Ratios

$10^1$

6

8

10

12

14

16

Dimension  $d$

- Ratio  $F_1$  SD/ $F_2$  SD
- Ratio lower bound (theory)

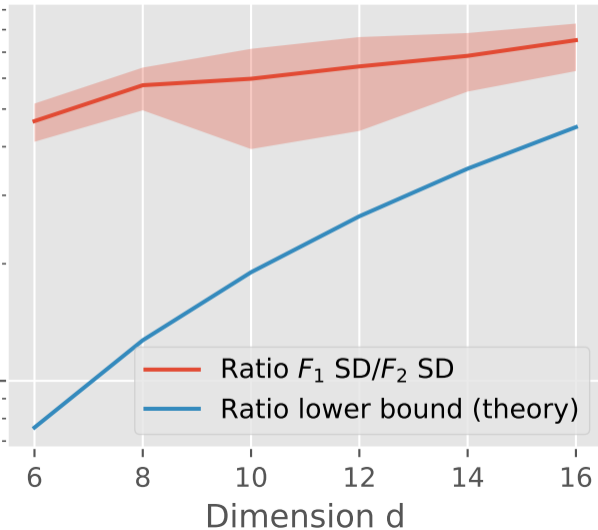

Supplement: Supplementary file 1 [file a081c174f5913958ba8c6443bacffcb9-Supplemental.zip › separation_results_final_supp_mat/separation_results_code/figures/f1_f2_sd_fig2_5_500000.pdf]

Metrics for same distribution samples

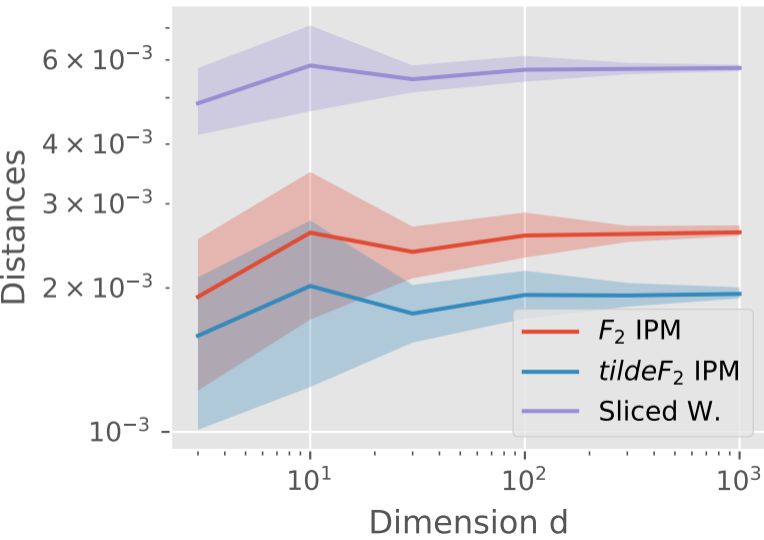

Supplement: Supplementary file 1 [file a081c174f5913958ba8c6443bacffcb9-Supplemental.zip › separation_results_final_supp_mat/separation_results_code/figures/f1_f2_sliced_w_fig2_1_0.1_100000.pdf]

# Ratios between $F_1$ and $F_2$ IPM estimates ( $k = 6$ )

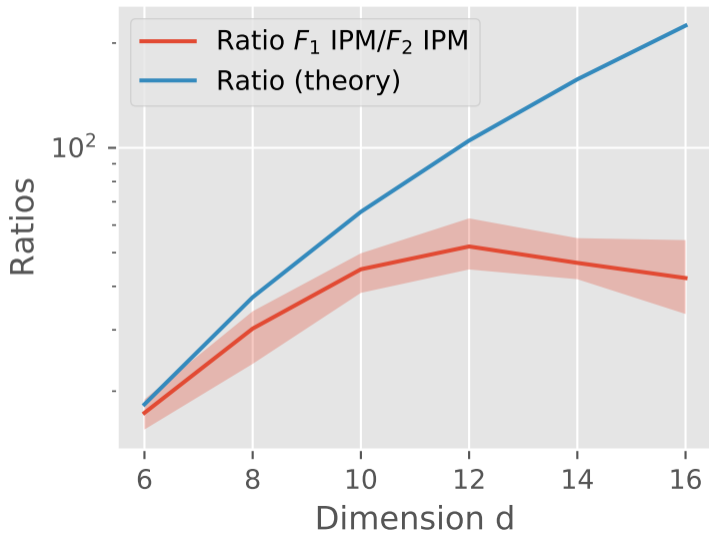

Supplement: Supplementary file 1 [file a081c174f5913958ba8c6443bacffcb9-Supplemental.zip › separation_results_final_supp_mat/separation_results_code/figures/f1_f2_ipm_fig2_6_50000000.pdf]

# Ratios $F_1$ IPM / $F_2$ IPM ( $k = 6$ )

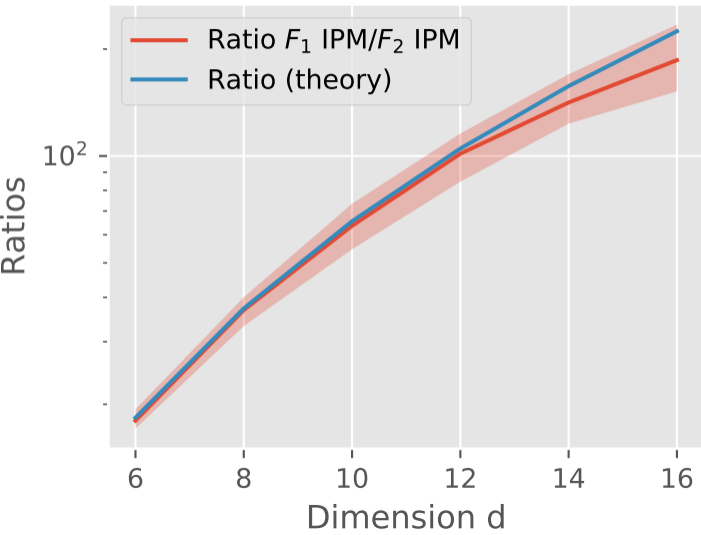

Supplement: Supplementary file 1 [file a081c174f5913958ba8c6443bacffcb9-Supplemental.zip › separation_results_final_supp_mat/separation_results_code/figures/f1_f2_ipm_fig2_6_4400000000.pdf]

# Ratios $F_1$ IPM / $F_2$ IPM ( $k = 6$ )

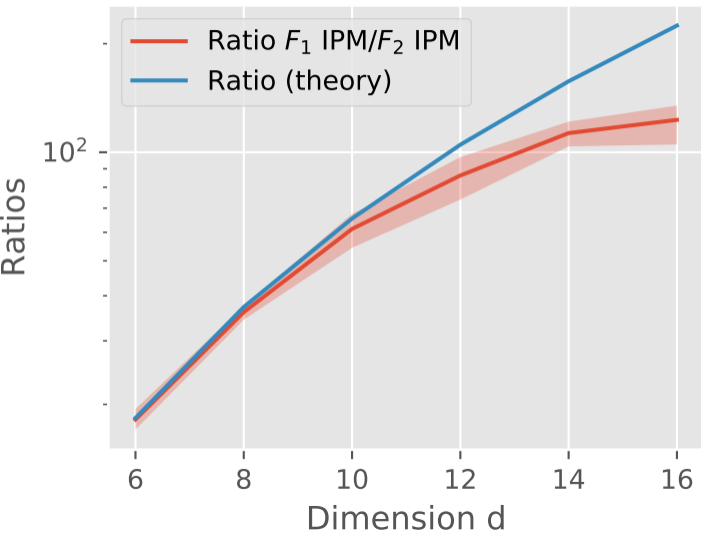

Supplement: Supplementary file 1 [file a081c174f5913958ba8c6443bacffcb9-Supplemental.zip › separation_results_final_supp_mat/separation_results_code/figures/f1_f2_ipm_fig2_6_600000000.pdf]
